# Supplementary material
Source: PubMed Central journal article supplement (PMC10144504)

*Supplementary figure titles and legends*

**Figure S1 (related to Fig 1). RAMP2 purification and effects on GCGR-induced  $G_s$  turnover.**

(**A**) Schematic of the RAMP2 growth and purification protocol, size exclusion chromatography profile demonstrating purity, as well as stability to repeated size exclusion runs. (**B**) Time-dependent GTP turnover assay demonstrating GDP-independent turnover for  $G_s$  alone and

enhancement in turnover in the presence of agonist-bound GCGR. Addition of RAMP2 results in a [GDP] dependent inhibition in this turnover rate even past  $G_s$  alone. (C) GTP turnover assay demonstrating that RAMP2 inhibition is specific to GCGR and not observed for  $\beta_2AR$ . (D) GTP turnover assay demonstrating that while RAMP2 has no direct effects on  $\beta_2AR$  turnover, GCGR/RAMP2 complex is able to sequester away  $G_s$  from and inhibit  $\beta_2AR$  dependent turnover. P values in C and D are denoted as follows: ns ( $P>0.05$ ), \* ( $P\leq 0.05$ ), \*\* ( $P\leq 0.01$ ), \*\*\* ( $P\leq 0.001$ ), and \*\*\*\* ( $P\leq 0.0001$ ). (E) Individual example BRET affinity experiments demonstrating changes in affinity and total change in BRET in the absence and presence of RAMP2 for the three TAMRA-labeled glucagon analogues used here.

**Figure S2 (related to Fig 2). Characterizing ZP7680 and RAMP2 effects on GRK phosphorylation of GCGR.**

Schild plots were generated for the antagonist des-His1[Glu9]-Glucagon-amide (A) and ZP7680 (B) in the absence of IBMX and indicated that ZP7680 is effective in blocking the glucagon response at lower concentrations compared to des-His1[Glu9]-Glucagon-amide, which is reflected in a higher estimated affinity ( $K_B/pA_2$ ) from a Schild plot analysis (Fig. 2A). Data in A and B are representative curves from one experiment performed in duplicate from a total of 4 independent experiments of each. (C) Schematic depicting ATP depletion assay for kinase activity. (D) ATP depletion assay showing inhibition of GRK phosphorylation of GCGR in the presence of RAMP2. (E) Phosphorylation ProQ gels showing inhibition of GRK5 phosphorylation of GCGR by RAMP2 but (F) no inhibition of GCGR phosphorylation by GRK2.

**Figure S3 (related to Fig 3). Perturbation in GCGR dynamics by RAMP2 observed by HX-MS.**

(A) Effect of binding partner addition on deuterium uptake for RAMP2 (+/- GCGR, left) and GCGR (+/- RAMP2, right). Replicate experiments are shown as separate panels. The difference in the percent deuteration for a given peptide at a given time point is plotted against the sequence position. Brown peptides show less than a 5% difference in exchange between conditions, cyan peptides in RAMP2 are protected upon complexing with GCGR, and peptides that display unimodal and bimodal deprotection upon binding of RAMP2 are plotted in salmon and purple, respectively. (B) Replicate data for individual spectra of select peptides within regions of GCGR that display non-EX2 behavior as plotted in Fig. 2. (C) FLAG pulldown on RAMP2 assessed by SDS-PAGE gel demonstrating that antagonist peptide (ZP7680) bound GCGR interacts best with RAMP2.

**Figure S4 (related to Fig 4). Site-specific labeling of mC-GCGR with cysteine-reactive groups and smFRET experiments.**

(A) Schematic highlighting the reaction scheme used to block labile, off-target disulfides and allow for specific labeling at introduced cysteines on GCGR. The highly cysteine-reactive nitroxide spin label Proxyl was used to test for off-target labeling by observing with cwEPR. Briefly, introduced cysteines are labeled specifically with the nitroxide spin label RSSR, followed by iodoacetamide capping of residual free thiols, presumably selectively at labile disulfides. Finally, RSSR is stripped off with TCEP, allowing for subsequent labeling with highly reactive fluorophores or spin labels of interest. (B) smFRET distributions of cysteine labeled GCGR comparing antagonist (green, N=235) or antagonist and RAMP2 bound receptor (orange, N=176). (C) Example smFRET traces showing donor (green), acceptor (red) intensity values as well as the calculated FRET values (blue) for a series of ligand conditions including apo, antagonist, agonist, agonist and  $G_s$ , and agonist with  $G_s$  and RAMP2.

**Figure S5 (related to Fig 5). Cryo-EM sample preparation and data processing.**

Schematic depicting purification protocols (A) and complex formation (B). (C) Size exclusion chromatograms and SDS-PAGE gels demonstrating complex formation with RAMP2. (D) Cryo-EM data collection and processing pipeline, showing representative cryo-EM image of the GCGR-G<sub>s</sub>-RAMP2 complex, reference-free 2D cryo-EM averages, and cryo-EM data processing flow chart, including particle selection, classifications, density map reconstructions, and the “gold standard” FSC curves from cryoSPARC. (E) Cryo-EM density map and model are shown for the seven transmembrane helices and ZP3780.

**Figure S6 (related to Fig 5 and Fig 6). Broken ECD and agonist contacts in the presence of RAMP2 and 3D variability analysis.**

In the presence of RAMP2, there is no structured density for a conserved disulfide between C43 and C67 in the ECD (A), as well as a loss of a hydrogen bond between K37 in the ECD and S213 in ECL1 along with a cation- $\pi$  interaction within the N-terminal helix of the ECD (B). Ligand contacts with TM1 and TM2 are also lost, as seen in the loss of contact between E20 in the agonist and Q131 in TM1 (C) and D195 in TM2 switching hydrogen bond partners from Q3 in the agonist to R199 within TM2 (D). (E) The first (red) and last (light blue) frames within each of the 3 major principal components of the 3D variability analysis implemented in cryoSPARC. (F) Covalently crosslinked GCGR-RAMP2-G<sub>s</sub> was subjected to cryo-EM imaging. The resulting particles were low-resolution, and only contained structured density for GCGR/RAMP2 or GCGR/G<sub>s</sub> containing particles (not shown). The 2D reference-free class averages show density that corresponds well to the orientation predicted from AlphaFold for the GCGR/RAMP2 interface, i.e. both in an “upwards” conformation.

**Figure S7 (related to Fig 5). Differences in ECD conformation between glucagon-family and calcitonin-family Family B GPCRs.**

The structures of calcitonin-like receptor (CLR) bound to each of RAMP1 (CGRP, A), RAMP2 (AM1, B), or RAMP3 (AM2, C) display slight differences in binding pose but broadly bind to the CLR ECD with the N-terminal helix in an orientation near perpendicular to the bilayer norm. In contrast, the peptide-bound GCGR ECD is in an orientation that is incompatible with the same binding pose as that observed for CLR (D), even though there is some flexibility in this region in glucagon receptor family members (E).

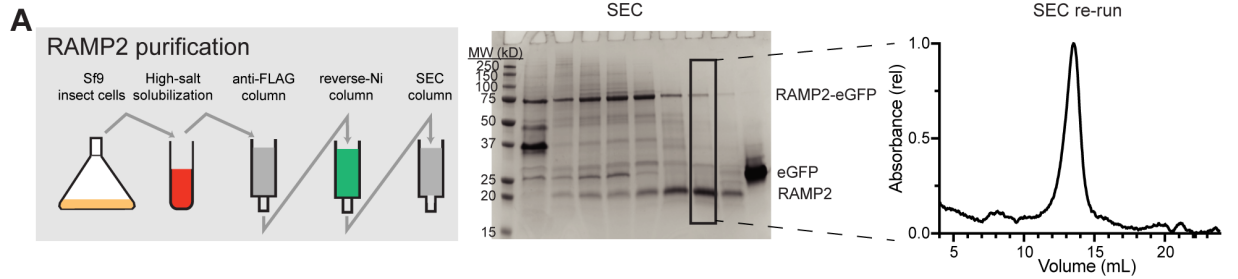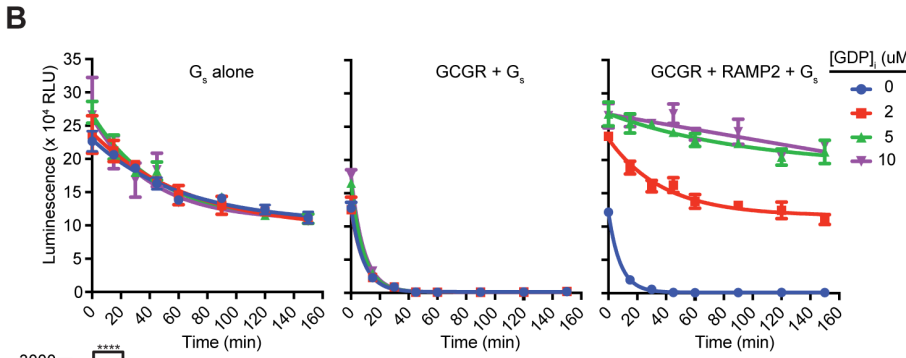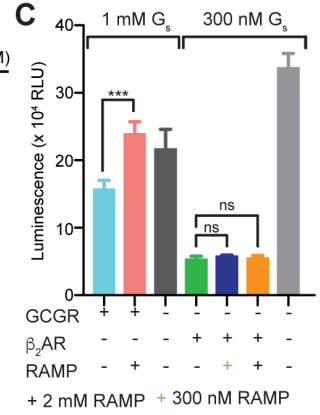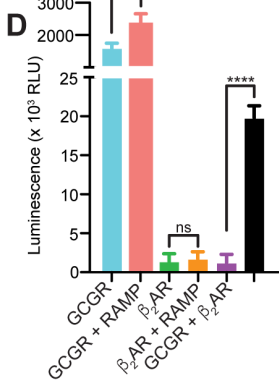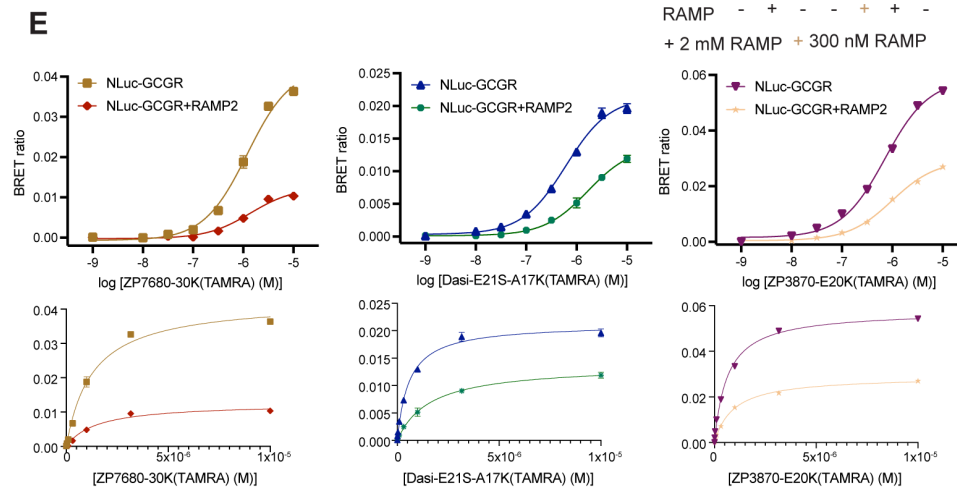

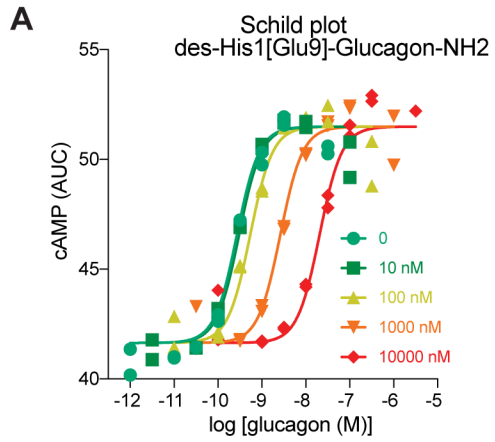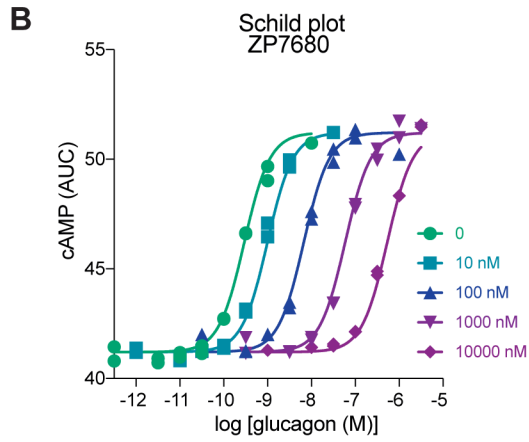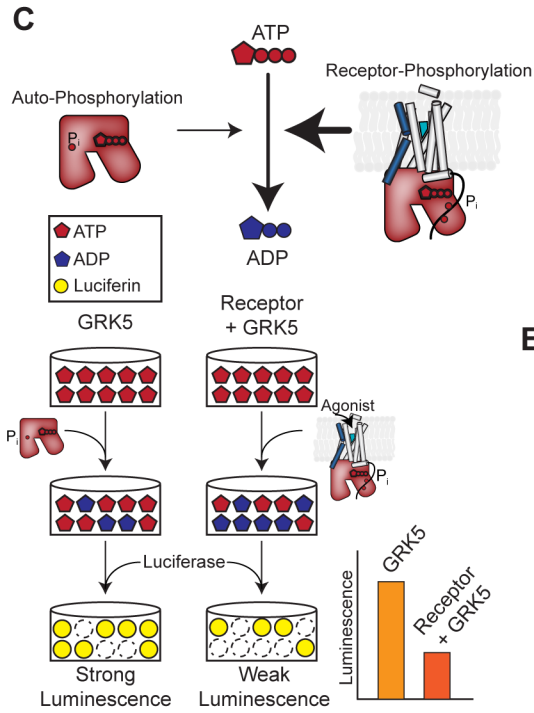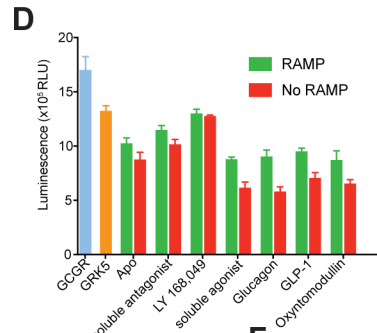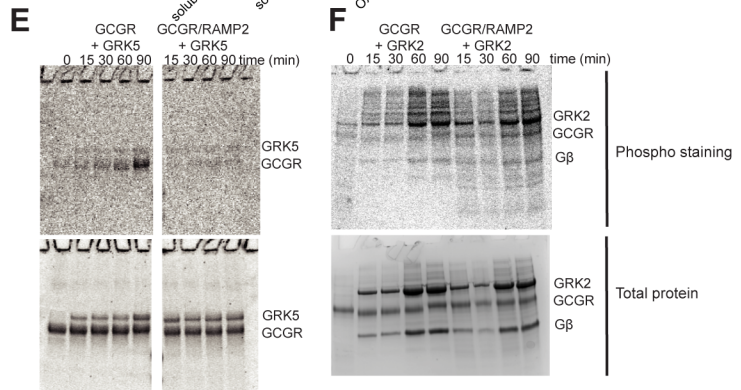

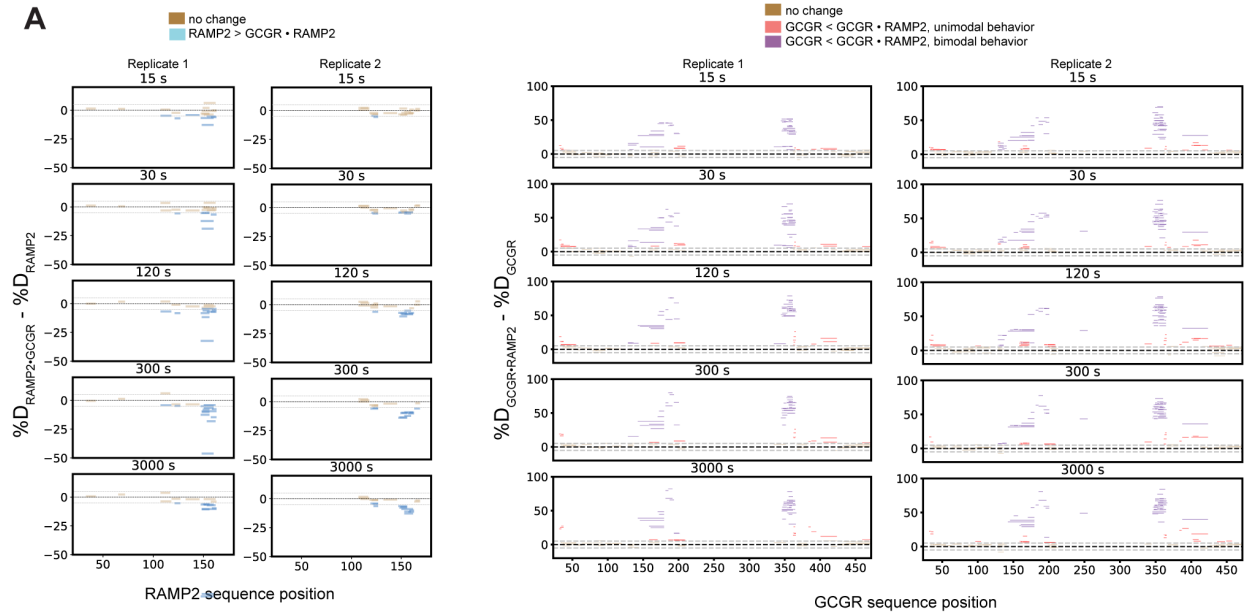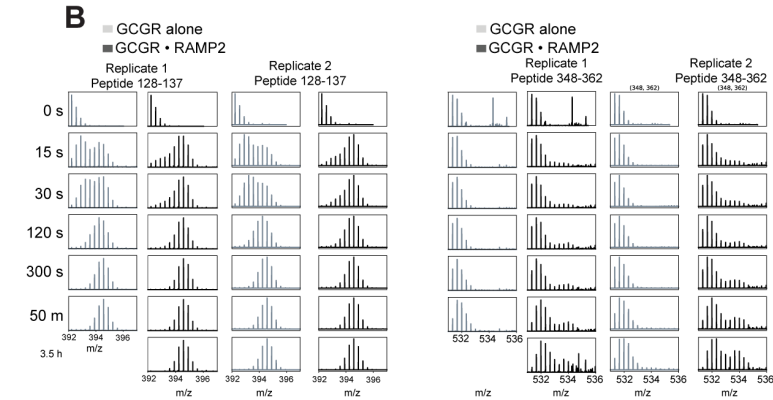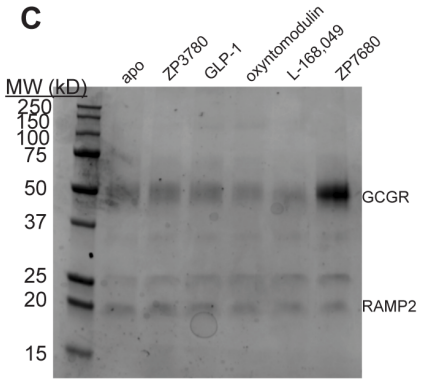

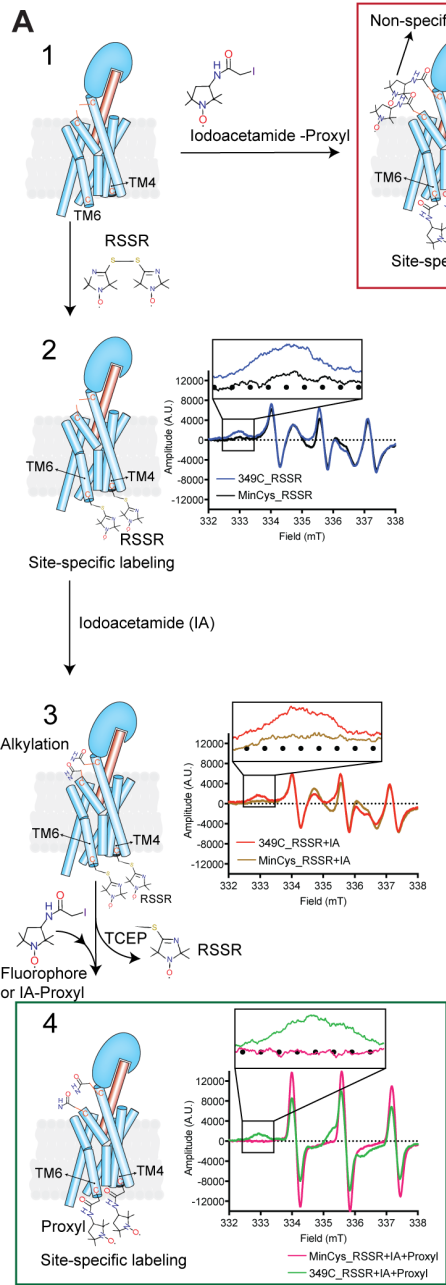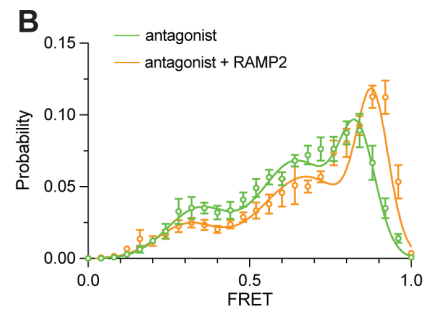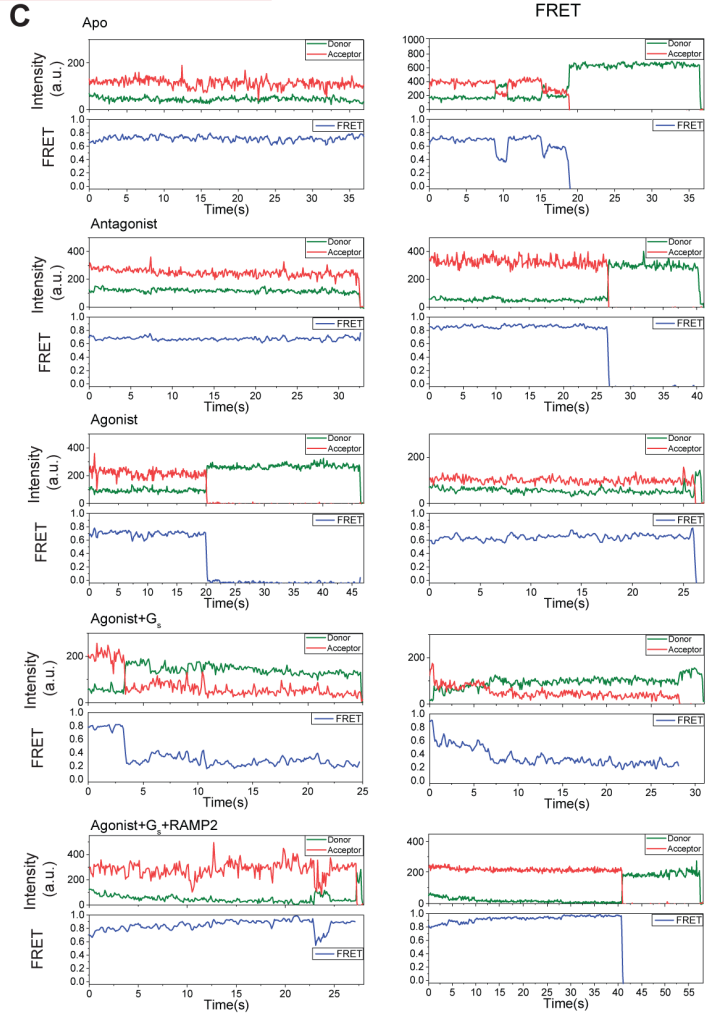



### A GCGR purification

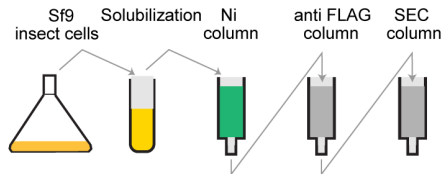

### G<sub>s</sub> heterotrimer purification

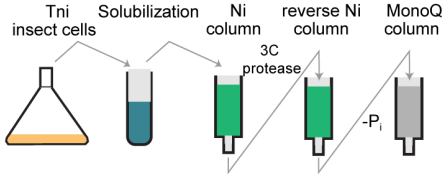

### Nb35 purification

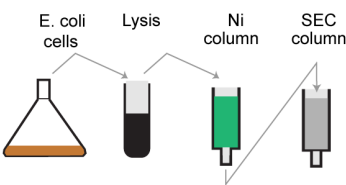

**D** 4,343 micrographs  $\xrightarrow[\text{autopicking}]{\text{motion correction ctf correction}}$  2,612,672 particles

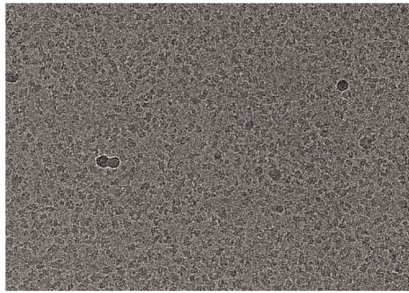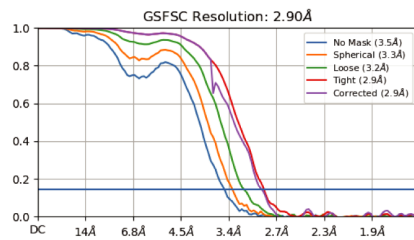

### E

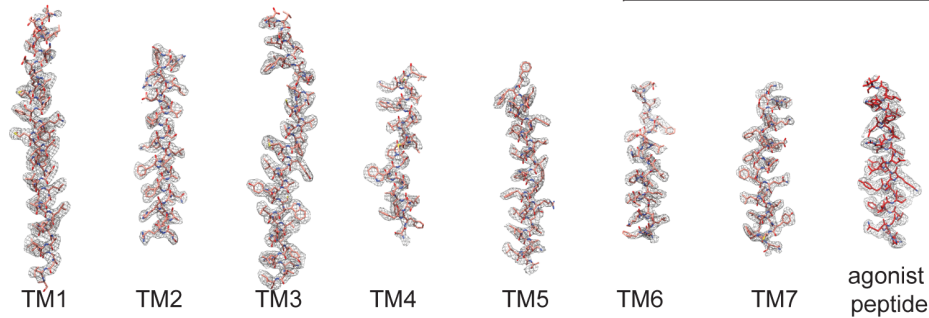

### B GCGR-RAMP2-G<sub>s</sub> complex formation

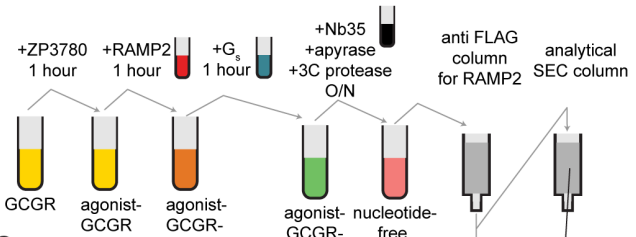

### C

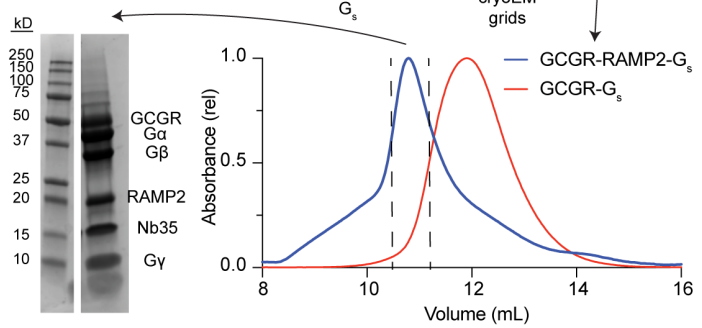

2D classification  $\rightarrow$  434,551 particles

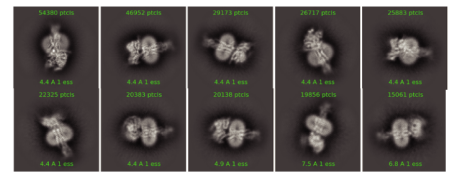

3D classification

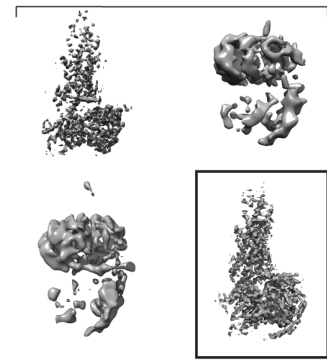

Non-uniform Refinement  $\rightarrow$  212,196 particles

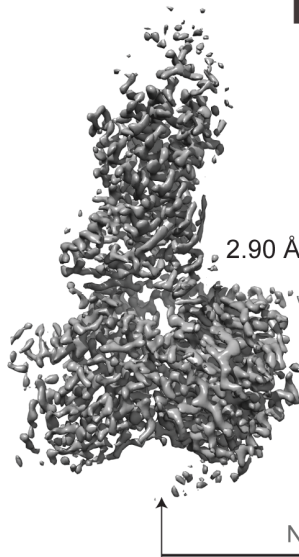



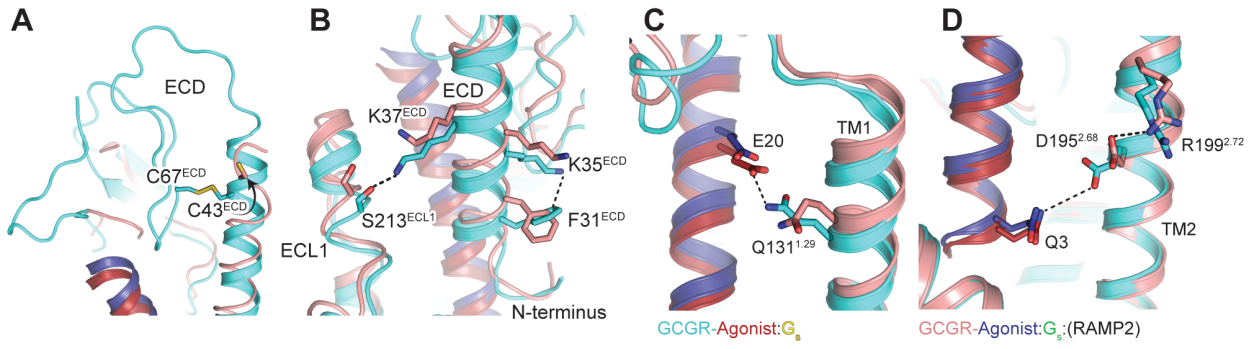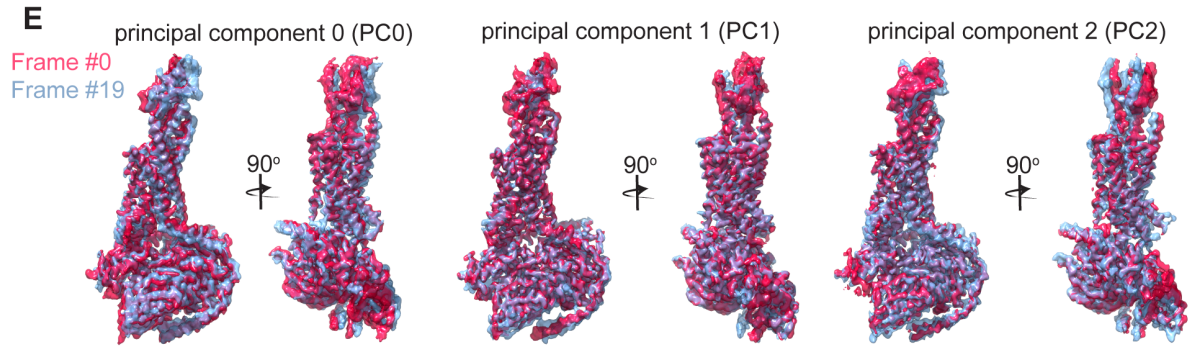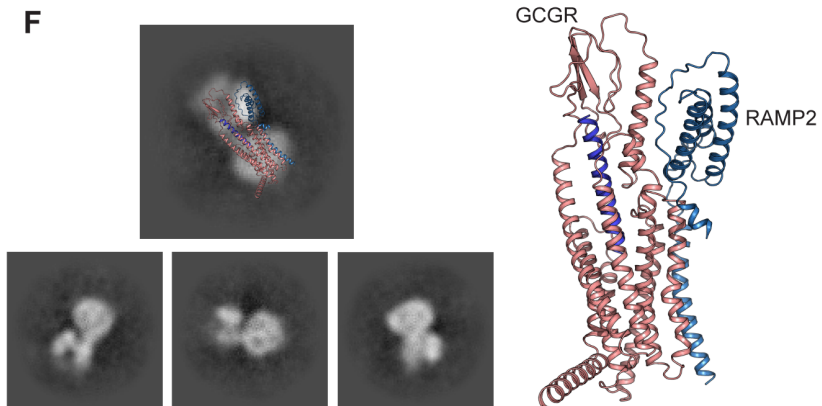

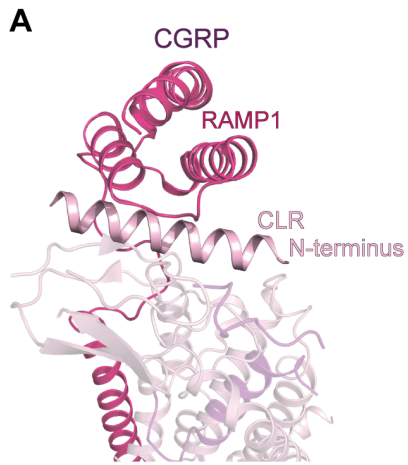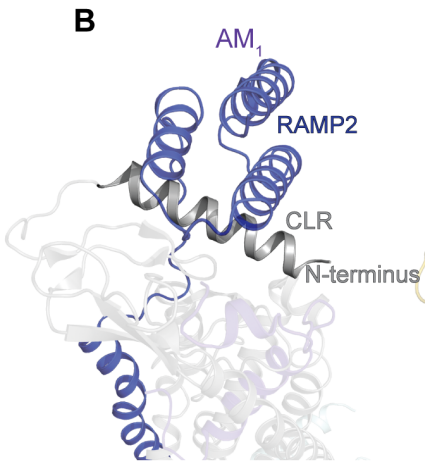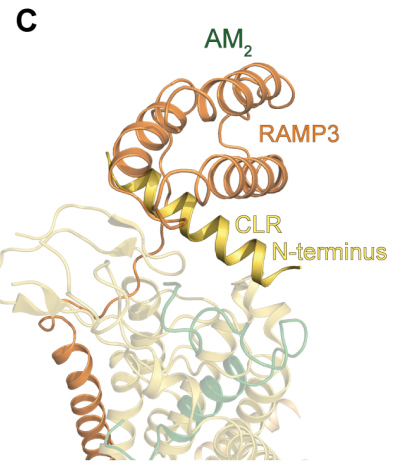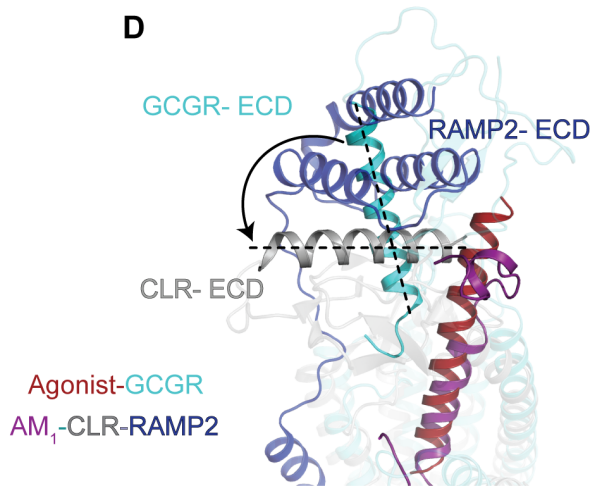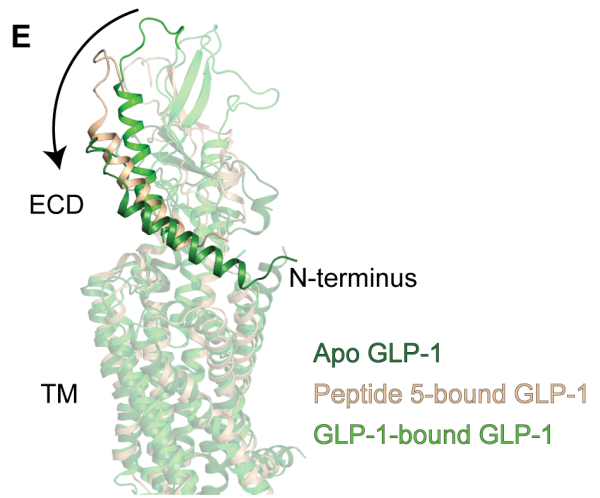

Supplement: NIHMS1886828-supplement-1.pdf [file NIHMS1886828-supplement-1.pdf]
